# Supplementary material
Source: HighWire-hosted journal article supplement (https://nutrition.bmj.com/content/bmjnph-2018-000014)
Supplement: inline-supplementary-material-1 [file inline-supplementary-material-1.pdf]

| Region             | Country                                                                                                                                                                                       |
|--------------------|-----------------------------------------------------------------------------------------------------------------------------------------------------------------------------------------------|
| Northern Africa    | Algeria<br>Egypt<br>Libya<br>Morocco<br>Sudan<br>Tunisia<br>Western Sahara                                                                                                                    |
| Sub-Saharan Africa | British Indian Ocean Territory<br>Burundi<br>Comoros<br>Djibouti<br>Eritrea<br>Ethiopia<br>French Southern Territories<br>Kenya<br>Madagascar<br>Malawi<br>Mauritius<br>Mayotte<br>Mozambique |

| Region | Country                                                                                                                                                                                                                                                                                                           |
|--------|-------------------------------------------------------------------------------------------------------------------------------------------------------------------------------------------------------------------------------------------------------------------------------------------------------------------|
|        | Réunion<br>Rwanda<br>Seychelles<br>Somalia<br>South<br>Sudan<br>Uganda<br>United<br>Republic of<br>Tanzania<br>Zambia<br>Zimbabwe<br>Angola<br>Cameroon<br>Central<br>African<br>Republic<br>Chad<br>Congo<br>Democratic<br>Republic of<br>the Congo<br>Equatorial<br>Guinea<br>Gabon<br>Sao Tome<br>and Principe |

| Region                          | Country                                                                                                                                                                                                                                                                         |
|---------------------------------|---------------------------------------------------------------------------------------------------------------------------------------------------------------------------------------------------------------------------------------------------------------------------------|
|                                 | Botswana<br>Eswatini<br>Lesotho<br>Namibia<br>South Africa<br>Benin<br>Burkina<br>Faso<br>Cabo Verde<br>Côte d'Ivoire<br>Gambia<br>Ghana<br>Guinea<br>Guinea-<br>Bissau<br>Liberia<br>Mali<br>Mauritania<br>Niger<br>Nigeria<br>Saint Helena<br>Senegal<br>Sierra Leone<br>Togo |
| Latin America and the Caribbean | Anguilla                                                                                                                                                                                                                                                                        |

| Region | Country                                                                                                                                                                                                                                                                                              |
|--------|------------------------------------------------------------------------------------------------------------------------------------------------------------------------------------------------------------------------------------------------------------------------------------------------------|
|        | Antigua and Barbuda<br>Aruba<br>Bahamas<br>Barbados<br>Bonaire, Sint Eustatius and Saba<br>British Virgin Islands<br>Cayman Islands<br>Cuba<br>Curaçao<br>Dominica<br>Dominican Republic<br>Grenada<br>Guadeloupe<br>Haiti<br>Jamaica<br>Martinique<br>Montserrat<br>Puerto Rico<br>Saint Barthélemy |

| Region | Country                                                                                                                                                                                                                                                                                                                                           |
|--------|---------------------------------------------------------------------------------------------------------------------------------------------------------------------------------------------------------------------------------------------------------------------------------------------------------------------------------------------------|
|        | Saint Kitts<br>and Nevis<br>Saint Lucia<br>Saint Martin<br>(French<br>Part)<br>Saint<br>Vincent and<br>the<br>Grenadines<br>Sint Maarten<br>(Dutch part)<br>Trinidad and<br>Tobago<br>Turks and<br>Caicos<br>Islands<br>United<br>States Virgin<br>Islands<br>Belize<br>Costa Rica<br>El Salvador<br>Guatemala<br>Honduras<br>Mexico<br>Nicaragua |

| Region | Country                                                                                                                                                                                                                                                                                                        |
|--------|----------------------------------------------------------------------------------------------------------------------------------------------------------------------------------------------------------------------------------------------------------------------------------------------------------------|
|        | Panama<br>South<br>America<br>Argentina<br>Bolivia<br>(Plurinational<br>State of)<br>Bouvet<br>Island<br>Brazil<br>Chile<br>Colombia<br>Ecuador<br>Falkland<br>Islands<br>(Malvinas)<br>French<br>Guiana<br>Guyana<br>Paraguay<br>Peru<br>South<br>Georgia and<br>the South<br>Sandwich<br>Islands<br>Suriname |

| Region               | Country                                                                                                                                                             |
|----------------------|---------------------------------------------------------------------------------------------------------------------------------------------------------------------|
|                      | Uruguay<br>Venezuela<br>(Bolivarian<br>Republic of)                                                                                                                 |
| Northern America     | Bermuda<br>Canada<br>Greenland<br>Saint<br>Pierre and<br>Miquelon<br>United<br>States of<br>America<br>Antarctica                                                   |
| Eastern-Central Asia | Kazakhstan<br>Kyrgyzstan<br>Tajikistan<br>Turkmenistan<br>Uzbekistan<br>China<br>China, Hong<br>Kong Special<br>Administrative<br>Region<br>China, Macao<br>Special |

| Region             | Country                                                                                                                                                                              |
|--------------------|--------------------------------------------------------------------------------------------------------------------------------------------------------------------------------------|
|                    | Administrative<br>Region<br>Democratic<br>People's<br>Republic of<br>Korea<br>Japan<br>Mongolia<br>Republic of<br>Korea                                                              |
| South-eastern Asia | Brunei<br>Darussalam<br>Cambodia<br>Indonesia<br>Lao<br>People's<br>Democratic<br>Republic<br>Malaysia<br>Myanmar<br>Philippines<br>Singapore<br>Thailand<br>Timor-Leste<br>Viet Nam |
| Southern Asia      | Afghanistan<br>Bangladesh                                                                                                                                                            |



| Region                         | Country                                                                                                                                                    |
|--------------------------------|------------------------------------------------------------------------------------------------------------------------------------------------------------|
|                                | Bhutan<br>India<br>Iran<br>(Islamic<br>Republic<br>of)<br>Maldives<br>Nepal<br>Pakistan<br>Sri Lanka                                                       |
| Western Asia (excluding Qatar) | Armenia<br>Azerbaijan<br>Bahrain<br>Cyprus<br>Georgia<br>Iraq<br>Israel<br>Jordan<br>Kuwait<br>Lebanon<br>Oman<br>Saudi<br>Arabia<br>State of<br>Palestine |

| Region          | Country                                                                                                                            |
|-----------------|------------------------------------------------------------------------------------------------------------------------------------|
|                 | Syrian<br>Arab<br>Republic<br>Turkey<br>United<br>Arab<br>Emirates<br>Yemen                                                        |
| Eastern Europe  | Belarus<br>Bulgaria<br>Czechia<br>Hungary<br>Poland<br>Republic of Moldova<br>Romania<br>Russian Federation<br>Slovakia<br>Ukraine |
| Northern Europe | Åland<br>Islands<br>Channel<br>Islands<br>Guernsey<br>Jersey<br>Sark<br>Denmark                                                    |

| Region          | Country                                                                                                                                                                                                                                        |
|-----------------|------------------------------------------------------------------------------------------------------------------------------------------------------------------------------------------------------------------------------------------------|
|                 | Estonia<br>Faroe<br>Islands<br>Finland<br>Iceland<br>Ireland<br>Isle of<br>Man<br>Latvia<br>Lithuania<br>Norway<br>Svalbard<br>and Jan<br>Mayen<br>Islands<br>Sweden<br>United<br>Kingdom<br>of Great<br>Britain<br>and<br>Northern<br>Ireland |
| Southern Europe | Albania<br>Andorra<br>Bosnia and<br>Herzegovina                                                                                                                                                                                                |

| Region         | Country                                                                                                                                                                                   |
|----------------|-------------------------------------------------------------------------------------------------------------------------------------------------------------------------------------------|
|                | Croatia<br>Gibraltar<br>Greece<br>Holy See<br>Italy<br>Malta<br>Montenegro<br>Portugal<br>San Marino<br>Serbia<br>Slovenia<br>Spain<br>The former<br>Yugoslav<br>Republic of<br>Macedonia |
| Western Europe | Austria<br>Belgium<br>France<br>Germany<br>Liechtenstein<br>Luxembourg<br>Monaco<br>Netherlands<br>Switzerland                                                                            |

| Region      | Country                                                                                                                                                                                                                                                                                  |
|-------------|------------------------------------------------------------------------------------------------------------------------------------------------------------------------------------------------------------------------------------------------------------------------------------------|
| Australasia | Australia<br>Christmas<br>Island<br>Cocos<br>(Keeling)<br>Islands<br>Heard<br>Island and<br>McDonald<br>Islands<br>New<br>Zealand<br>Norfolk<br>Island<br>Fiji<br>New<br>Caledonia<br>Papua<br>New<br>Guinea<br>Solomon<br>Islands<br>Vanuatu<br>Guam<br>Kiribati<br>Marshall<br>Islands |

| Region | Country                                                                                                                                                                                                                                                                  |
|--------|--------------------------------------------------------------------------------------------------------------------------------------------------------------------------------------------------------------------------------------------------------------------------|
|        | Micronesia<br>(Federated<br>States of)<br>Nauru<br>Northern<br>Mariana<br>Islands<br>Palau<br>United<br>States<br>Minor<br>Outlying<br>Islands<br>American<br>Samoa<br>Cook<br>Islands<br>French<br>Polynesia<br>Niue<br>Pitcairn<br>Samoa<br>Tokelau<br>Tonga<br>Tuvalu |

| Region | Country                         |
|--------|---------------------------------|
|        | Wallis and<br>Futuna<br>Islands |
